# Supplementary material
Source: HighWire-hosted journal article supplement (https://innovations.bmj.com/content/4/3/142)
Supplement: inline-supplementary-material-1 [file inline-supplementary-material-1.docx]

**Supplementary 1 – content of SMSes**

**These SMSes were sent, in the French language, to the study population**

**« Evaluation de l’impact du programme éducatif mDiabète sur l’équilibre glycémique et sur la compliance thérapeutique**

**des patients diabétiques au Sénégal »**

*(Starting 13 February, 2017)*

**(Week 1)**

1. mdiabete va vous aider à comprendre comment avoir le bon taux de sucre dans le sang (glycémie) pour éviter les malaises et les complications.
2. Le cerveau, le cœur ont besoin de sucre, mais si le sang en apporte trop (hyperglycémie) ou pas assez (hypoglycémie) ils fonctionnent mal ; ça peut être grave.
3. Ce qui fait monter la glycémie : toute la nourriture et les boissons. Risque d’hyperglycémie = grandes portions de nourriture, des boissons sucrées
4. Ce qui fait baisser la glycémie : le jeune, l’exercice physique, les comprimés, l’insuline. Risque d’hypoglycémie = pas de repas, sport intense, trop d’insuline.
5. Contrôler son diabète c’est équilibrer chaque jour sa glycémie en ajustant la nourriture, choix et quantité, au travail physique et aux doses de traitement.
6. Pour connaître sa glycémie on peut utiliser une goutte de sang et un lecteur. On peut aussi écouter son corps. mdiabète va vous l’apprendre.
7. Retrouvez des informations complémentaires sur [www.mdiabete.gouv.sn](http://www.mdiabete.gouv.sn). Prochainement, reconnaître les signes de l’hyperglycémie et hypoglycémie.

**(Week 2)**

1. Un diabète mal équilibré augmente le risque de complications. Pour rester en forme et éviter celles-ci, je décide de changer et je surveille chaque jour mon diabète.
2. Aujourd’hui j’ai mangé beaucoup, bu trop de jus. J’ai oublié mes médicaments. Je n’ai pas fait d’exercice. Ma glycémie est certainement élevée, je dois la faire baisser.
3. Pour faire baisser ma glycémie, je mange de petites portions, surtout des légumes, je supprime les jus et boissons sucrées. Je n’oublie pas mes médicaments.
4. Aujourd’hui j’ai très soif, j’urine souvent, j’ai la bouche sèche, je me sens très fatigué, je vois trouble. Danger, ma glycémie est très élevée. Je demande vite conseil, ça peut être grave.
5. Au contraire aujourd’hui j’ai pris mes comprimés ou mon insuline mais j’ai peu mangé ou fait du sport. Je transpire, j’ai la tête qui tourne, je suis fatigué. Ma glycémie est certainement basse. Je dois la remonter.
6. Pour remonter ma glycémie, exceptionnellement je bois un jus et je mange tout de suite une portion de nourriture sans attendre le repas.
7. Retrouvez des informations complémentaires sur [www.mdiabete.gouv.sn](http://www.mdiabete.gouv.sn). Prochainement, reconnaître un diabète bien équilibré.

**(Week 3, one message of encouragement)**

1. Chaque jour vous faites attention à votre diabète. Bravo, continuez. Progressivement vous saurez donner à votre corps juste le sucre dont il a besoin, ni trop, ni trop peu.

**(Week 4)**

1. Vous faites attention, vous pensez que votre diabète est mieux équilibré, vous allez le vérifier en mesurant votre glycémie.
2. L’équilibre, c’est quand ma glycémie est inférieure à 1,20 g/L à jeun et à 1, 80 g/L 2h après le repas.
3. L’équilibre se mesure aussi tous les 3 mois avec le dosage de l’hémoglobine glyquée (HbA1c). Elle doit être inférieure à 7%.
4. Votre médecin a inscrit votre glycémie et hémoglobine glyquée dans votre carnet mdiabète. Au prochain contrôle vous jugerez vous même de vos progrès.
5. Votre médecin a aussi surveillé votre tension artérielle et votre cholestérol. Parlez avec lui de vos résultats.
6. Mon médecin est mon partenaire. Je suis conscient que je dois suivre ses conseils : alimentation équilibrée, activité physique régulière et adaptée, prise des médicaments prescrits.
7. Retrouvez des informations complémentaires sur [www.mdiabete.gouv.sn](http://www.mdiabete.gouv.sn). Prochainement, les bases de la nutrition.

**(Week 5)**

1. Pour une vie saine faire 3 repas modérés à heures régulières (+ deux collations éventuellement pour les diabétiques sous insuline). Lutter contre l’obésité.
2. Le corps a besoin d’une nourriture la plus variée possible. Chaque aliment a ses qualités nutritives et ses vitamines. Variez vos menus. Surveillez votre poids.
3. Les aliments sont classés en groupes. Sucres rapides et lents (glucides), graisses (lipides) viande poissons (protides). Apprenez à les reconnaître.
4. Les sucres rapides, jus, sodas, miel, chocolat, confiture, bonbons, sont dangereux car ils font beaucoup monter la glycémie.
5. Les sucres lents, céréales, racines, tubercules, légumineuses, riz, pain sont à consommer modérément à chaque repas. Eviter les grosses portions.
6. Un repas équilibré contient 20% protides (viande poisson), 30% lipides (graisses) 50% glucides lents (légumes, graines, pain). Boissons sans sucre.,
7. Retrouvez des informations complémentaires sur [www.mdiabete.gouv.sn](http://www.mdiabete.gouv.sn/). Prochainement, d’autres conseils de nutrition.

**(Week 6, one message of encouragement)**

Chaque jour vous faites attention à votre diabète. Bravo, continuez. Progressivement vous saurez donner à votre corps juste le sucre dont il a besoin, ni trop, ni trop peu

**(Semaine 7)**

1. A la dernière visite vous avez mesuré votre hémoglobine glyquée ou HbA1c. Lisez bien le résultat et notez-le.
2. Si votre résultat est moins de 7%, vous êtes sur la bonne voie, continuez
3. Si votre résultat est plus de 7%, vous devez absolument faire plus attention à la nourriture et ne jamais oublier vos médicaments.
4. Les sucres rapides comme les boissons sucrées, jus, sodas, coca cola... sont dangereux pour les diabétiques. A consommer exceptionnellement.
5. Les sucres lents, riz, graines, pain... sont utiles mais en portions limitées. Pour ne pas avoir faim, ajoutez des légumes.
6. Un muscle qui travaille est un muscle qui brûle du sucre. L'exercice physique est utile pour contrôler votre diabète.
7. Retrouvez des informations complémentaires sur [www.mdiabete.gouv.sn](http://www.mdiabete.gouv.sn/). Prochainement d'autres conseils.

**(Week 8, one message of encouragement)**

1. Chaque jour vous faites attention à votre diabète. Bravo, continuez. Progressivement vous saurez donner à votre corps juste le sucre dont il a besoin, ni trop, ni trop peu.

**(Week 9)**

1. Il vous reste un mois pour mettre en pratique les conseils avant la prochaine visite médicale. Continuez vos efforts
2. Un diabète bien équilibré est indispensable pour envisager de jeuner pendant le Ramadan. Parlez-en à la prochaine visite.
3. En réduisant le sel, les graisses et les sucres on diminue les risques d’hypertension et d’accidents cardiovasculaires.
4. Ce qui est bon pour vous l’est aussi pour toute votre famille. Les bonnes habitudes se prennent dans l’enfance.
5. Surveillez votre poids et celui de vos enfants. Ensemble luttez contre l’obésité. Privilégiez légumes, fruits et exercice physique.
6. Quand vous grossissez ou maigrissez le médecin va adapter les doses de vos médicaments. Pesez-vous et notez votre poids.
7. Retrouvez des informations complémentaires sur [www.mdiabete.gouv.sn](http://www.mdiabete.gouv.sn/). Prochainement d'autres conseils

**(Week 10, one message of encouragement)**

Chaque jour vous faites attention à votre diabète. Bravo, continuez. Progressivement vous saurez donner à votre corps juste le sucre dont il a besoin, ni trop, ni trop peu

**(Week 11)**

1. Bientôt votre prochain examen du sang. N’oubliez pas de prendre vos médicaments et de surveiller votre alimentation.
2. Cuisinez moins gras, mettez du vert dans votre assiette, mangez 3 repas en quantités modérées.
3. Tomate, concombre, aubergine, courge, oignons, salade, carotte, chamognon, choux, épinards sont vos amis.
4. Hydratez-vous sans modération, buvez au moins 1 litre par jour de boisson non sucrée
5. Manger trop d’une catégorie d’aliments (les sucres, les graisses) et pas assez d’une autre (les légumes, les fruits) est une cause de déséquilibre du diabète
6. Ces bonnes habitudes alimentaires sont utiles à toute la famille pour préserver sa santé. Votre diabète est une occasion d’oublier de mauvaises habitudes.
7. Nous espérons que mdiabète vous a aidé. Retrouvez des informations complémentaires sur [www.mdiabete.gouv.sn](http://www.mdiabete.gouv.sn/).

**(Week 12, end of period message)**

Votre avis sur mdiabète nous intéresse. Vous allez revoir votre médecin, parlez-en avec lui. Vous serez informé des prochaines campagnes.
